# Supplementary material for: Curcumin Prevents Aflatoxin B1 Hepatoxicity by Inhibition of Cytochrome P450 Isozymes in Chick Liver
Source: PubMed Central journal article supplement (PMC5127124; doi:10.3390/toxins8110327), 2016-11-10
Supplement: toxins-08-00327-s001.pdf [file toxins-08-00327-s001.pdf]

# Supplementary Materials: Curcumin Prevents Aflatoxin B<sub>1</sub> Hepatotoxicity by Inhibition of Cytochrome P450 Isozymes in Chick Liver

Ni-Ya Zhang, Ming Qi, Ling Zhao, Ming-Kun Zhu, Jiao Guo, Jie Liu, Chang-Qin Gu, Shahid Ali Rajput, Christopher Steven Krumm, De-Sheng Qi and Lv-Hui Sun

**Table S1.** Effects of dietary AFB<sub>1</sub> and CM concentrations on growth performance in chicks <sup>1</sup>.

| Item                    | Control    | AFB <sub>1</sub> | CM          | AFB <sub>1</sub> + CM |
|-------------------------|------------|------------------|-------------|-----------------------|
| Week 1–2                |            |                  |             |                       |
| Body weight gain, g/day | 34.0 ± 1.4 | 34.9 ± 1.4       | 33.8 ± 2.0  | 33.4 ± 2.9            |
| Feed intake, g/day      | 48.4 ± 8.3 | 46.8 ± 5.6       | 45.8 ± 5.5  | 46.1 ± 5.8            |
| Gain/feed, g/kg         | 703 ± 132  | 767 ± 106        | 746 ± 83.2  | 734 ± 128             |
| Week 3–4                |            |                  |             |                       |
| Body weight gain, g/day | 68.3 ± 8.0 | 72.9 ± 8.7       | 68.2 ± 6.9  | 70.1 ± 6.3            |
| Feed intake, g/day      | 116 ± 7.8  | 125 ± 22.9       | 111.9 ± 8.1 | 118 ± 11.6            |
| Gain/feed, g/kg         | 607 ± 26.5 | 589 ± 27.4       | 609 ± 38.3  | 592 ± 41.3            |

<sup>1</sup> Values are expressed as means ± SD (*n* = 5), and means with different superscript letters differ (*p* < 0.05). AFB<sub>1</sub>, aflatoxin B<sub>1</sub>; CM, curcumin. Experimental details of Control and AFB<sub>1</sub> groups are given in Sun et al. (2016) [1].

**Table S2.** Basal diet formulations and nutritional contents <sup>1</sup>.

| Ingredients                 | Percentage (%) | Nutrition Component          | Content |
|-----------------------------|----------------|------------------------------|---------|
| Corn                        | 58.2           | Crude protein (%)            | 20.3    |
| Wheat bran                  | 2.0            | Metabolizable energy (MJ/kg) | 12.3    |
| Soybean meal                | 30.0           | Calcium (%)                  | 1.0     |
| Soybean oil                 | 2.5            | Available phosphorus (%)     | 0.43    |
| Cottonseed meal             | 3.0            | Methione (%)                 | 0.60    |
| CaCO <sub>3</sub>           | 1.0            | Methione+cystine (%)         | 0.90    |
| CaHPO <sub>4</sub>          | 2.0            | Lysine (%)                   | 1.10    |
| Salt                        | 0.3            | Tryptophan (%)               | 0.22    |
| L-Lysine (%)                | 0.15           | Threonine (%)                | 0.69    |
| DL-Methione (%)             | 0.3            |                              |         |
| Choline chloride            | 0.2            |                              |         |
| Vitamin premix <sup>2</sup> | 0.05           |                              |         |
| Mineral premix <sup>3</sup> | 0.3            |                              |         |

<sup>1</sup> The 5% corn in basal diet was substituted by 5% moldy corn in AFB<sub>1</sub> and CM+AFB<sub>1</sub> group diets, respectively, which made the AFB<sub>1</sub> contents up to 100 ug/kg in these two diets. AFB<sub>1</sub>, aflatoxin B<sub>1</sub>; CM, curcumin. <sup>2</sup> Vitamin premix provided per kg of diet: retinyl acetate, 10,280 IU; cholecalciferol 2280 IU; dl- $\alpha$ -tocopheryl acetate, 17.12 mg; menadione, 6.82 mg; thiamin, 2.28 mg; riboflavin, 5.68 mg; pantothenic acid, 12.25 mg; pyridoxine, 2.28 mg; niacin, 22.84 mg; biotin, 0.18 mg; folic acid, 1.12 mg. <sup>3</sup> Mineral premix provided per kg of diet: iron, 100 mg; copper, 8 mg; manganese, 20 mg; zinc, 100 mg; iodine, 0.7 mg.

## Reference

1. Sun, L.H.; Zhang, N.Y.; Zhu, M.K.; Zhao, L.; Zhou, J.C.; Qi, D.S. Prevention of Aflatoxin B<sub>1</sub> hepatotoxicity by dietary selenium is associated with inhibition of cytochrome P450 isozymes and up-regulation of six selenoprotein genes in chick liver. *J. Nutr.* **2016**, *143*, 1115–1122.
